# Supplementary material for: Irreversibility of winter precipitation over the Northeastern Pacific and Western North America against CO2 forcing
Source: Springer Nature journal article supplement (doi:10.1038/s41612-024-00864-2), 2024-12-19
Supplement: MOESM1 [file 41612_2024_864_MOESM1_ESM.pdf]

Supplementary Information for

**Irreversibility of winter precipitation over the Northeastern Pacific and  
Western North America against CO<sub>2</sub> forcing**

Zhenhao Xu<sup>1,2,3</sup>, Yu Kosaka<sup>2\*</sup>, Masaki Toda<sup>2,4</sup>, Tomoki Iwakiri<sup>5,6</sup>, Gang Huang<sup>1,3\*</sup>, Fei Ji<sup>7,8</sup>,  
Ayumu Miyamoto<sup>2,9</sup>, and Weichen Tao<sup>1</sup>

1. State Key Laboratory of Numerical Modeling for Atmospheric Sciences and Geophysical Fluid Dynamics, Institute of Atmospheric Physics, Chinese Academy of Sciences, Beijing, China.
2. Research Center for Advanced Science and Technology, The University of Tokyo, Tokyo, Japan.
3. University of Chinese Academy of Sciences, Beijing, China.
4. Max-Planck Institute for Meteorology, Hamburg, Germany.
5. Atmosphere and Ocean Research Institute, The University of Tokyo, Chiba, Japan.
6. Meteorological Research Institute, Ibaraki, Japan.
7. College of Atmospheric Sciences, Lanzhou University, Lanzhou, China.
8. Collaborative Innovation Center for Western Ecological Safety, Lanzhou University, Lanzhou, China.
9. Scripps Institution of Oceanography, University of California, San Diego, La Jolla, CA, USA.

**\* Corresponding authors:**

Dr. Yu Kosaka,

E-mail : [ykosaka@atmos.rcast.u-tokyo.ac.jp](mailto:ykosaka@atmos.rcast.u-tokyo.ac.jp)

Research Center for Advanced Science and Technology, The University of Tokyo

Dr. Gang Huang,

E-mail : [hg@mail.iap.ac.cn](mailto:hg@mail.iap.ac.cn)

Institute of Atmospheric Physics, Chinese Academy of Sciences

Submitted to *npj climate and atmospheric science*

October 28<sup>th</sup>, 2024

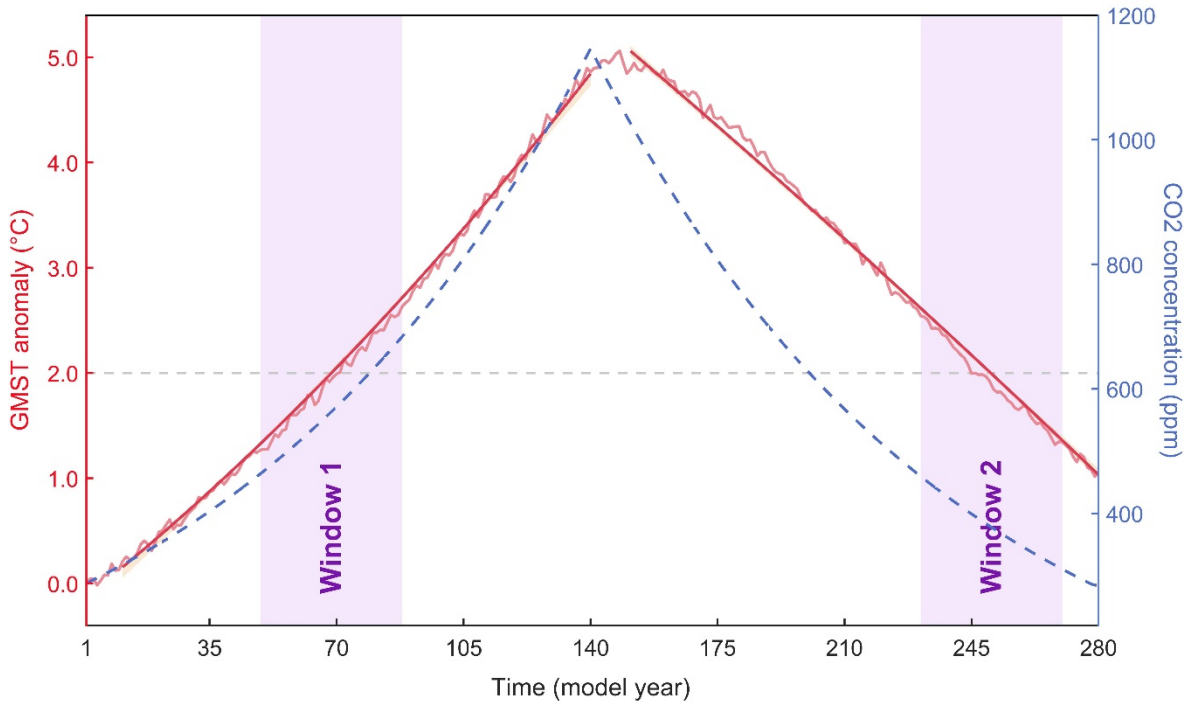

**Supplementary Fig. 1** | Same as Figure 1 (a), but from CMIP6 multi-model ensemble mean, with 40-year-long windows located.

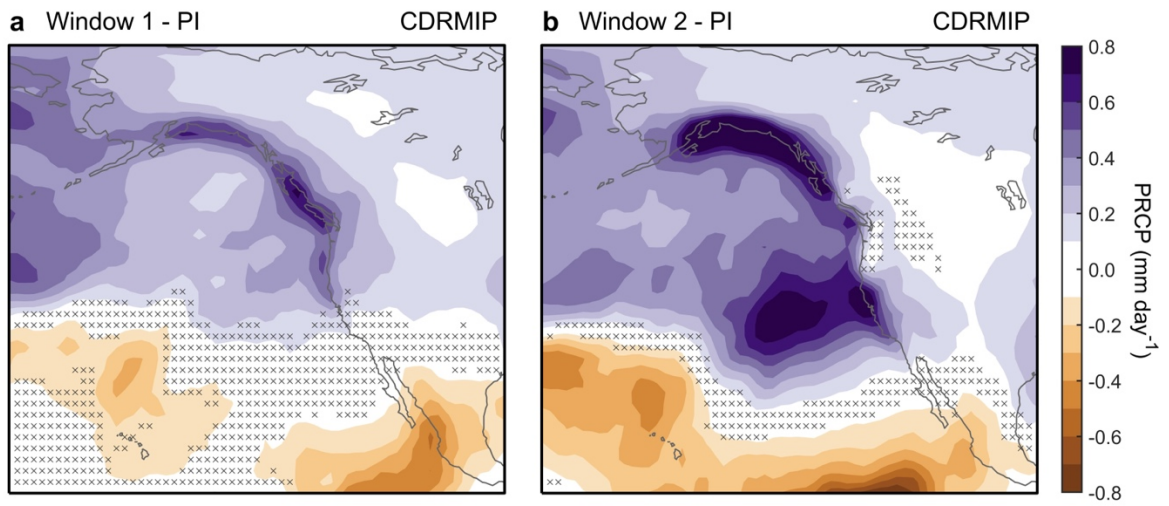

**Supplementary Fig. 2** | Same as Figure 2 (f) and (g), but based on the CMIP6 CDRMIP multi-model ensemble mean. Crosses denote insignificant using the two-sided Student's *t*-test at a 95% confidence level.

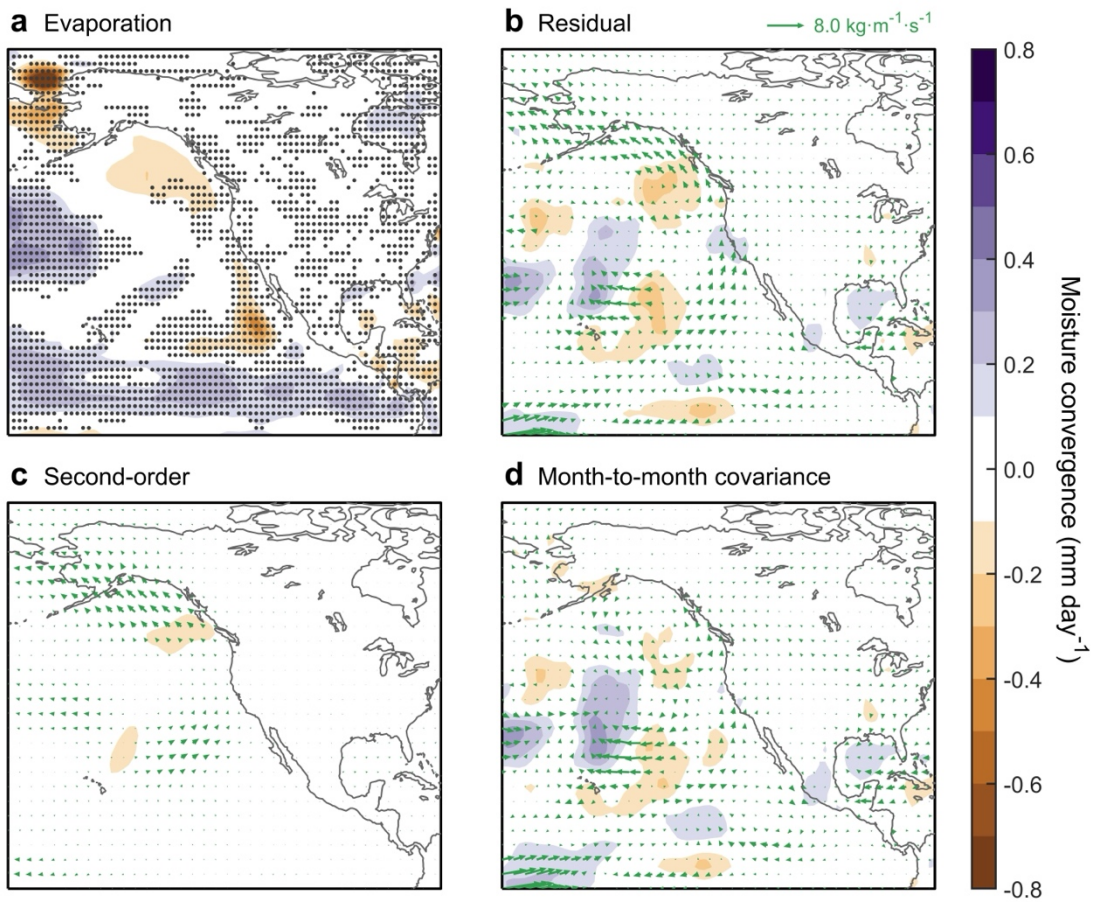

**Supplementary Fig. 3** | Asymmetric response of the evaporation (**a**), residual term (**b**; identical to Fig. 3f), second-order term (**c**), and month-to-month covariance term (**d**) from the atmospheric moisture budget analysis applied to MIROC6 (see Methods for details). Black dots in **a** indicate at least four of five members (80%) agree with the sign of the ensemble mean. Vectors in **b-d** show moisture flux.

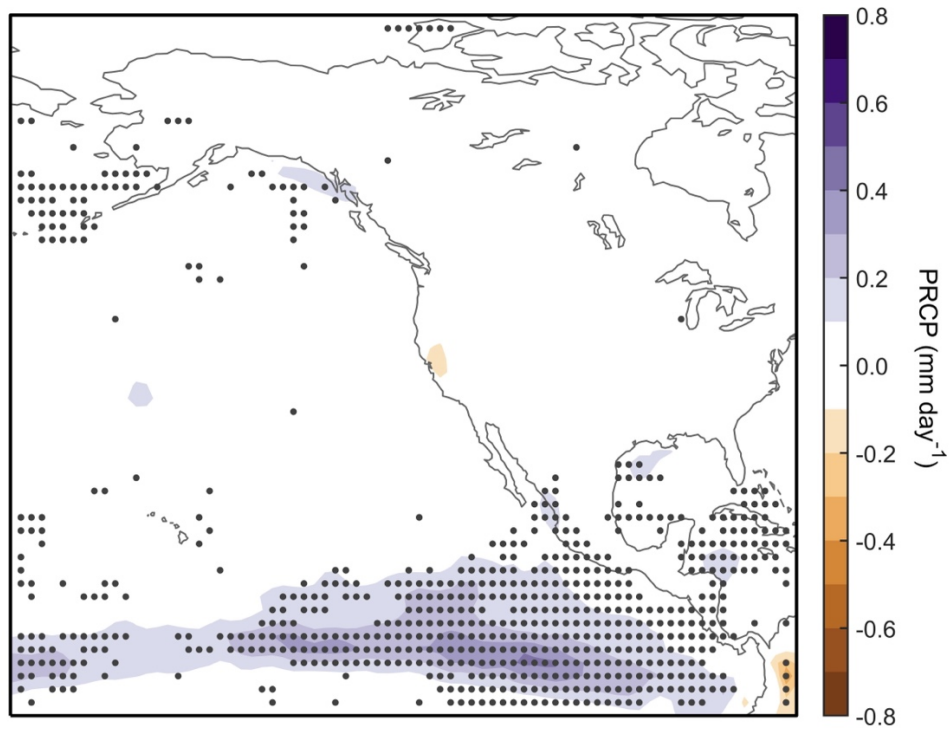

**Supplementary Fig. 4** | Asymmetric change in winter precipitation over the NPWNA region induced by the CO<sub>2</sub> direct effect estimated with the MIROC6 Hansen experiment. Black dots indicate that at least two-thirds of members agree with the sign of the ensemble mean.

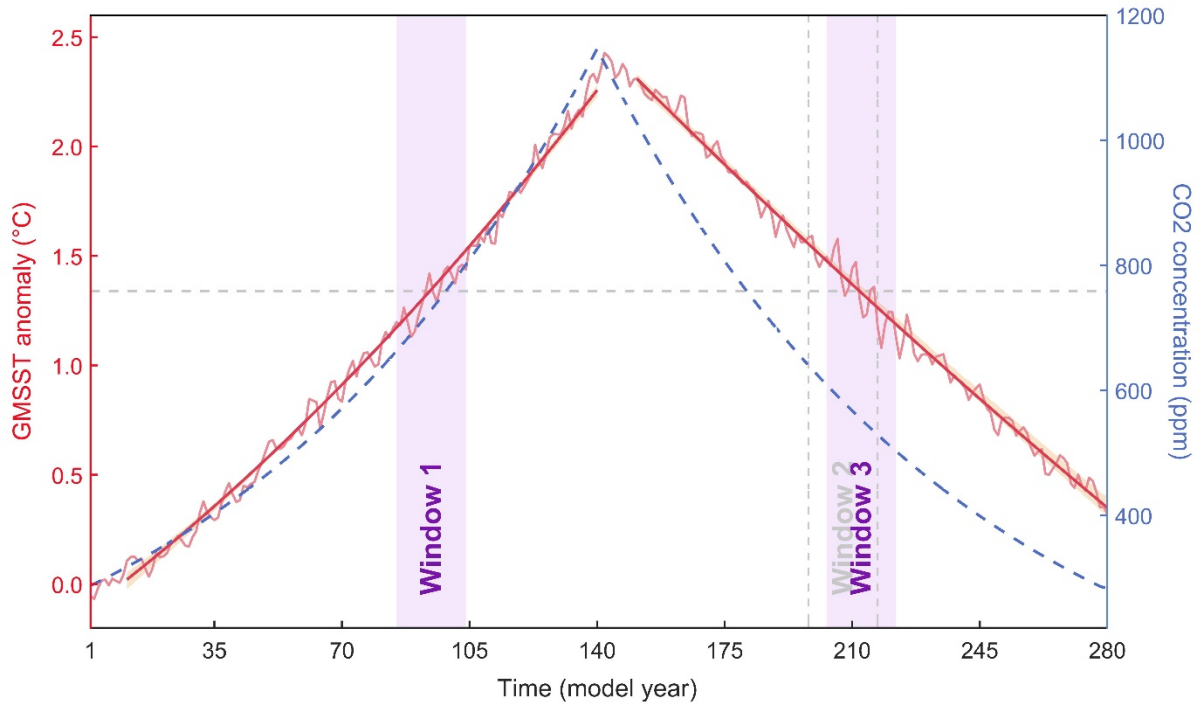

**Supplementary Fig. 5** | Same as Fig. 1 (a), but for GMSST. Note that Window 3 (Year 203-222; right purple shading) has the same GMSST increase as Window 1 (Year 85-104; left purple shading). The gray vertical lines indicate Window 2 (Year 198-217).

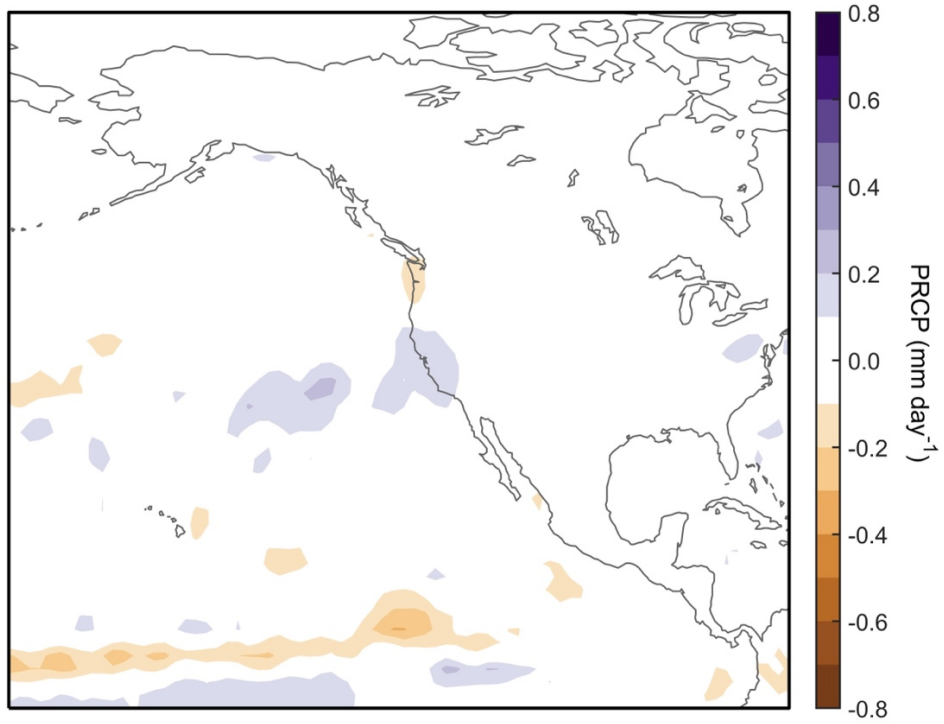

**Supplementary Fig. 6** | Asymmetric change in winter precipitation over the NPWNA region induced by the GMSST difference in MIROC6. Note that no change in the NPWNA region passes the two-sided Student's  $t$ -test at a 90% confidence level.



### Z500 response to diabatic forcing in LBM

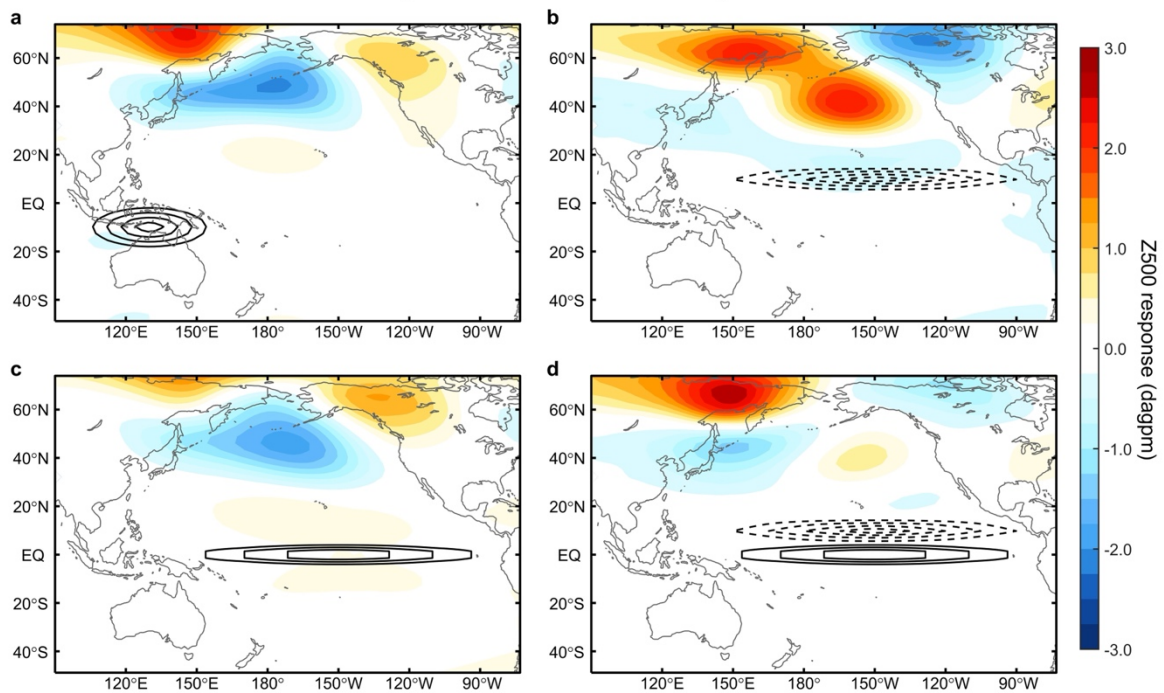

**Supplementary Fig. 7** | Steady response to imposed diabatic forcing in the LBM. Shadings represent the response of the 500 hPa geopotential height (unit: dagpm) to the diabatic heating in the north of Australia (a), cooling in the north off-equatorial central-eastern Pacific (b), and heating in the equatorial central-eastern Pacific (c). The subplot d shows the sum of b and c. Solid (dashed) contours indicate the prescribed diabatic heating (cooling) at  $\sigma = 0.45$  with intervals of  $0.2 \text{ K day}^{-1}$  (zero line is omitted for clarity).



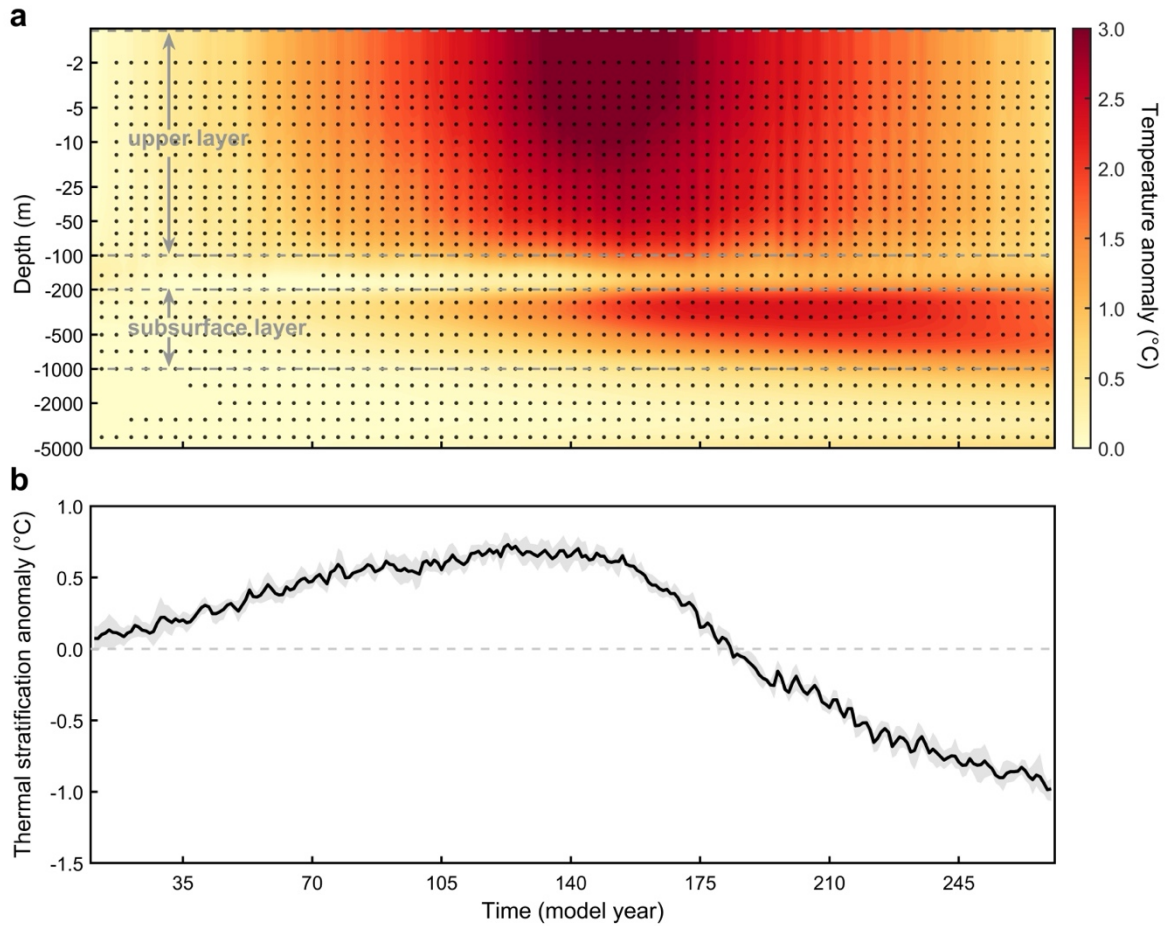

**Supplementary Fig. 8** | Nonlinear evolution of ocean thermal stratification in the tropical eastern Pacific during boreal winter in a symmetric changing CO<sub>2</sub> pathway in MIROC6. **a**, Temporal evolution of the vertical profile of ocean potential temperature over the tropical central-eastern Pacific (5°S-5°N, 180°-80°W). Note non-uniform vertical grid interval. Black dots indicate that at least four of five members (80%) agree with the sign of the ensemble mean. **b**, Time series of the stratification index defined as the difference of potential temperature anomalies between the upper layer (above 100 m) and sub-surface layer (200-1000 m). The gray shading indicates the 95% confidence interval based on the bootstrap method.

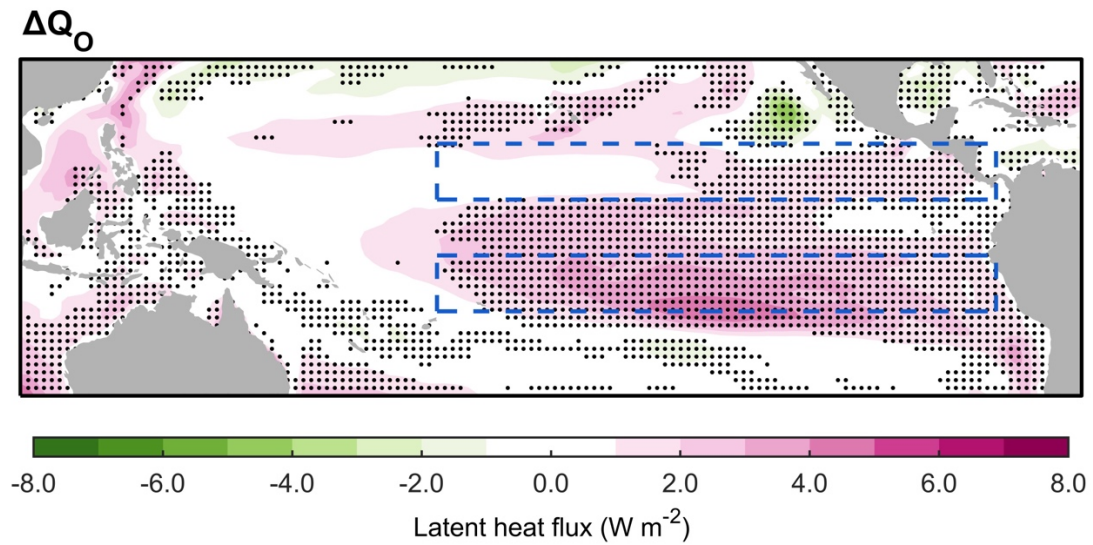

**Supplementary Fig. 9** | Asymmetric response of the latent heat flux in MIROC6 during boreal winter due to the SST dependence of evaporation (see Methods for details). Black dots indicate at least four of five members (80%) agree with the sign of the ensemble mean. Blue boxes are the same as those in Fig. 5.

**Supplementary Table 1.** Lists of the eight CMIP6 CDRMIP models used in this study with experiment details.

| Model Name    | Country (Center)          | Var label | Model year |                     |                          | Reference                 |
|---------------|---------------------------|-----------|------------|---------------------|--------------------------|---------------------------|
|               |                           |           | piControl  | 1pctCO <sub>2</sub> | 1pctCO <sub>2</sub> -cdr |                           |
| ACCESS-ESM1-5 | Australian (CSIRO)        | r1i1p1f1  | 0101-1000  | 101-250             | 241-1000                 | (Ziehn et al. 2020)       |
| CanESM5       | Canada (CCCma)            | r1i1p2f1  | 5550-6600  | 1850-2000           | 1991-2290                | (Swart et al. 2019)       |
| CESM2         | America (NCAR)            | r1i1p1f1  | 001-999    | 001-150             | 001-2000                 | (Danabasoglu et al. 2020) |
| CNRM-ESM2-1   | France (CNRM-CERFACS)     | r1i1p1f2  | 1850-2349  | 1850-1999           | 1990-2189                | (Séférian et al. 2019)    |
| GFDL-ESM4     | America (GFDL)            | r1i1p1f1  | 001-500    | 001-150             | 141-340                  | (Dunne et al. 2019)       |
| MIROC-ES2L    | Japan (JAMSTEC/NIES/AORI) | r1i1p1f2  | 1850-2349  | 1850-1999           | 1989-2490                | (Hajima et al. 2020)      |
| NorESM1-LM    | Norway (NCC)              | r1i1p1f1  | 1600-2100  | 001-150             | 141-399                  | (Seland et al. 2020)      |
| UKESM1-0-LL   | UK (MOHC)                 | r1i1p1f2  | 1960-3839  | 1850-1999           | 1990-2639                | (Sellar et al. 2019)      |

## Supplementary References

1. Danabasoglu, G. et al. The Community Earth System Model Version 2 (CESM2). *J. Adv. Model. Earth Syst.* **12**, e2019MS001916 (2020).
2. Dunne, J. P. et al. The GFDL Earth System Model Version 4.1 (GFDL-ESM 4.1): Overall coupled model description and simulation characteristics. *J. Adv. Model. Earth Syst.* **12**, e2019MS002015 (2020).
3. Hajima, T. et al. Development of the MIROC-ES2L Earth system model and the evaluation of biogeochemical processes and feedbacks. *Geosci. Model Dev.* **13**, 2197–2244 (2020).
4. Séférian, R. et al. Evaluation of CNRM Earth-System model, CNRM-ESM2-1: role of Earth system processes in present-day and future climate. *J. Adv. Model. Earth Syst.* **11**, 4182–4227 (2019).
5. Seland, Ø. et al. Overview of the Norwegian Earth System Model (NorESM2) and key climate response of CMIP6 DECK, historical, and scenario simulations. *Geosci. Model Dev.* **13**, 6165–6200 (2020).
6. Sellar, A. A. et al. Implementation of U.K. Earth system models for CMIP6. *J. Adv. Model. Earth Syst.* **12**, e2019MS001946 (2020).
7. Swart, N. C. et al. The Canadian Earth System Model version 5 (CanESM5.0.3). *Geosci. Model Dev.* **12**, 4823–4873 (2019).
8. Ziehn, T. et al. The Australian Earth System Model: ACCESS-ESM1.5. *J. South. Hemisphere Earth Syst. Sci.* **70**, 193-214 (2020).
